# Supplementary material for: Cognitive Mechanisms in Entrepreneurship Competence: Its Implication for Open Innovation
Source: MDPI journal article supplement (doi:10.3390/joitmc8020065), 2022-03-31
Supplement: s1 [file s1]

### Basic Information of Interviewee

| Entrepreneur code | Gender | Age | Education level    | Project                             | Starting time | Enterprise scale | Enterprise state | City      |
|-------------------|--------|-----|--------------------|-------------------------------------|---------------|------------------|------------------|-----------|
| Entrepreneur 1    | male   | 33  | master             | aquaculture base                    | 2015          | small            | collapsing       | Nanjing   |
| Entrepreneur 2    | male   | 37  | master             | education and training institutions | 2020          | small            | in business      | Shanghai  |
| Entrepreneur 3    | female | 35  | junior college     | beauty studio                       | 2017          | mini             | close down       | Fuzhou    |
| Entrepreneur 4    | male   | 25  | primary school     | jade sales                          | 2016          | mini             | close down       | Urumqi    |
| Entrepreneur 5    | female | 38  | master             | restaurant                          | 2010          | mini             | in business      | Shanghai  |
| Entrepreneur 6    | male   | 38  | senior high school | motorcycle driving school           | 2018          | mini             | collapsing       | Zhengzhou |
| Entrepreneur 7    | male   | 56  | primary school     | real estate development             | 1997          | large            | in business      | Hohhot    |
| Entrepreneur 8    | male   | 40  | master             | cultural media company              | 2012          | medium           | in business      | Beijing   |
| Entrepreneur 9    | male   | 53  | primary school     | textile mill                        | 1992          | large            | in business      | Shaoxing  |
| Entrepreneur      | female | 57  | junior high        | steel sales                         | 1987          | small            | in business      | Fuzhou    |

|                    |        |    |                       |                              |      |        |             |            |
|--------------------|--------|----|-----------------------|------------------------------|------|--------|-------------|------------|
| 10                 |        |    | school                |                              |      |        |             |            |
| Entrepreneur<br>11 | male   | 46 | doctor                | ecological farm              | 2017 | medium | in business | Haikou     |
| Entrepreneur<br>12 | male   | 47 | bachelor              | mould factory                | 1999 | medium | in business | Ningbo     |
| Entrepreneur<br>13 | female | 36 | junior high<br>school | cosmetics R & D<br>and sales | 2009 | medium | close down  | Shenzhen   |
| Entrepreneur<br>14 | male   | 52 | doctor                | B & B                        | 2020 | small  | collapsing  | Huangshan  |
| Entrepreneur<br>15 | female | 32 | master                | B & B                        | 2020 | small  | in business | Xi'an      |
| Entrepreneur<br>16 | male   | 45 | bachelor              | nanotechnology<br>enterprise | 2009 | medium | in business | Hefei      |
| Entrepreneur<br>17 | female | 42 | junior<br>college     | maternal care                | 2015 | mini   | in business | Fushun     |
| Entrepreneur<br>18 | male   | 50 | bachelor              | construction<br>company      | 2010 | large  | collapsing  | Guiyang    |
| Entrepreneur<br>19 | male   | 54 | doctor                | art auction<br>company       | 2006 | small  | in business | Macau      |
| Entrepreneur<br>20 | female | 32 | master                | purchasing<br>agent          | 2012 | mini   | in business | Cardiff,UK |
