# Supplementary material for: Cognitive Mechanisms in Entrepreneurship Competence: Its Implication for Open Innovation
Source: MDPI journal article supplement (doi:10.3390/joitmc8020065), 2022-03-31
Supplement: s1 [file s1]

## Data Quality Analysis

### Reliability and Validity Analysis

Firstly, we conduct reliability analysis.

Table A Reliability analysis of cognitive flexibility scale

| Scale        | Items       | CITC         | Cronbach's $\alpha$ |                     |
|--------------|-------------|--------------|---------------------|---------------------|
|              |             |              | after item deletion | Cronbach's $\alpha$ |
| alternatives | alt1        | 0.736        | 0.926               | 0.932               |
|              | <b>alt2</b> | <b>0.211</b> | <b>0.942</b>        |                     |
|              | alt3        | 0.762        | 0.925               |                     |
|              | alt4        | 0.696        | 0.927               |                     |
|              | alt5        | 0.706        | 0.927               |                     |
|              | alt6        | 0.752        | 0.925               |                     |
|              | <b>alt7</b> | <b>0.244</b> | <b>0.941</b>        |                     |
|              | alt8        | 0.752        | 0.925               |                     |
|              | alt9        | 0.782        | 0.924               |                     |
|              | alt10       | 0.863        | 0.922               |                     |
|              | alt11       | 0.812        | 0.923               |                     |
|              | alt12       | 0.841        | 0.922               |                     |
|              | alt13       | 0.851        | 0.922               |                     |
| control      | con1        | 0.680        | 0.847               | 0.870               |
|              | con2        | 0.591        | 0.859               |                     |
|              | con3        | 0.810        | 0.829               |                     |
|              | con4        | 0.806        | 0.829               |                     |
|              | <b>con5</b> | <b>0.322</b> | <b>0.889</b>        |                     |
|              | con6        | 0.671        | 0.848               |                     |
|              | con7        | 0.650        | 0.851               |                     |

The Cronbach's  $\alpha$  of alternatives and control are 0.932 and 0.870 severally, which are larger than zero point eight, showing that the reliability of this scale is benign.

The CITC values of items alt2 and alt7 of the alternatives scale are less than zero point four. After deleting these two items, the Cronbach's  $\alpha$  will increase, reminding us that it is sensible to delete the two items.

The CITC value of the item con5 of the control scale is lower than zero point four. When the item is deleted, the Cronbach's  $\alpha$  will increase from 0.870 to 0.889, indicating that it is sensible to strike it out.

Table B Reliability analysis of entrepreneurial self-efficacy scale

| Scale                         | Items | CITC  | Cronbach's $\alpha$ |                     |
|-------------------------------|-------|-------|---------------------|---------------------|
|                               |       |       | after item deletion | Cronbach's $\alpha$ |
| Entrepreneurial self-efficacy | ents1 | 0.753 | 0.846               | 0.877               |
|                               | ents2 | 0.827 | 0.835               |                     |

|       |       |       |       |
|-------|-------|-------|-------|
| scale | ents3 | 0.657 | 0.862 |
|       | ents4 | 0.715 | 0.851 |
|       | ents5 | 0.565 | 0.875 |
|       | ents6 | 0.637 | 0.866 |

The Cronbach's  $\alpha$  of entrepreneurial self-efficacy scale is 0.877, bigger than zero point eight, showing that the reliability of the scale tends to be ideal.

As for CITC value, all the measurement items of the scale are larger than zero point four. Striking out any item cannot further promote Cronbach's  $\alpha$  of this scale. Therefore, there is no need to strike out any item.

Table C Reliability analysis of optimism scale

| Scale    | Items | CITC  | Cronbach's $\alpha$ |                     |
|----------|-------|-------|---------------------|---------------------|
|          |       |       | after item deletion | Cronbach's $\alpha$ |
| optimism | opt1  | 0.742 | 0.869               | 0.893               |
|          | opt2  | 0.790 | 0.861               |                     |
|          | opt3  | 0.568 | 0.897               |                     |
|          | opt4  | 0.849 | 0.851               |                     |
|          | opt5  | 0.643 | 0.884               |                     |
|          | opt6  | 0.699 | 0.876               |                     |

The Cronbach's  $\alpha$  of the scale is 0.893, higher than zero point eight, showing that the reliability of this scale is favorable.

As for CITC value, all the measurement items of the scale are larger than zero point four. Striking out any item cannot further promote Cronbach's  $\alpha$  coefficient of this scale. Hence there is no need to strike out any item.

Table D Reliability analysis of entrepreneurship competence scale

| Scale               | Items | CITC  | Cronbach's $\alpha$ |                     |
|---------------------|-------|-------|---------------------|---------------------|
|                     |       |       | after item deletion | Cronbach's $\alpha$ |
| opportunity ability | oppa1 | 0.734 | 0.793               | 0.854               |
|                     | oppa2 | 0.698 | 0.830               |                     |
|                     | oppa3 | 0.757 | 0.767               |                     |
| commitment ability  | coma1 | 0.726 | 0.755               | 0.835               |
|                     | coma2 | 0.661 | 0.816               |                     |
|                     | coma3 | 0.721 | 0.747               |                     |
| conception ability  | cona1 | 0.621 | 0.786               | 0.813               |
|                     | cona2 | 0.680 | 0.727               |                     |
|                     | cona3 | 0.690 | 0.714               |                     |
| financing ability   | fina1 | 0.725 | 0.880               | 0.884               |
|                     | fina2 | 0.821 | 0.795               |                     |
|                     | fina3 | 0.781 | 0.830               |                     |
| operation ability   | opea1 | 0.583 | 0.695               | 0.763               |
|                     | opea2 | 0.758 | 0.591               |                     |

|              |              |              |
|--------------|--------------|--------------|
| <b>Opea3</b> | <b>0.359</b> | <b>0.815</b> |
| opea4        | 0.592        | 0.697        |

The Cronbach's  $\alpha$  of opportunity ability, commitment ability, conception ability, financing ability, and operation ability scales are 0.854, 0.835, 0.813, 0.884, and 0.763 respectively, which are greater than or close to zero point eight, suggesting that the reliability of these scales is favorable.

The CITC value of the item opea3 of the operation ability scale is lower than zero point four. When the item is struck out, the Cronbach's  $\alpha$  coefficient increases, indicating that it is sensible to reject the item.

The CITC value of all measurement items of the rest of the scales are larger than zero point four. Deleting any item cannot further improve the Cronbach's  $\alpha$  coefficient of this scale. Consequently, it is not essential to reject the rest of the items.

Then we conduct validity analysis. Start with exploratory factor analysis.

Table E KMO and Bartlett test of cognitive flexibility scale

|                                   |                      |          |
|-----------------------------------|----------------------|----------|
| KMO sampling suitability quantity |                      | 0.943    |
| Bartlett's spherical test         | Last read chi square | 4344.263 |
|                                   | Degree of freedom    | 136      |
|                                   | Significance         | 0.000    |

KMO value is 0.943, bigger than zero point five; the statistical value of Bartlett's spherical test is 4344.263, and the p value acquired by analysis is 0.000, which is lower than the significance level of five percent, suggesting that this scale is appropriate for factor analysis.

Table F Factor analysis result of cognitive flexibility scale

|       | Factor       |              |
|-------|--------------|--------------|
|       | 1            | 2            |
| alt1  | <b>0.729</b> | 0.214        |
| alt3  | <b>0.777</b> | 0.226        |
| alt4  | <b>0.737</b> | 0.140        |
| alt5  | <b>0.749</b> | 0.147        |
| alt6  | <b>0.794</b> | 0.106        |
| alt8  | <b>0.792</b> | 0.107        |
| alt9  | <b>0.800</b> | 0.198        |
| alt10 | <b>0.897</b> | 0.158        |
| alt11 | <b>0.845</b> | 0.218        |
| alt12 | <b>0.878</b> | 0.172        |
| alt13 | <b>0.882</b> | 0.189        |
| con1  | 0.171        | <b>0.792</b> |
| con2  | 0.269        | <b>0.680</b> |
| con3  | 0.150        | <b>0.866</b> |
| con4  | 0.153        | <b>0.866</b> |
| con6  | 0.130        | <b>0.766</b> |
| con7  | 0.125        | <b>0.739</b> |

|                     |        |        |
|---------------------|--------|--------|
| Eigenvalue          | 7.384  | 4.062  |
| Variance percentage | 43.433 | 23.896 |
| Cumulative %        | 43.433 | 67.329 |

In accordance with the standard that the cumulative contribution rate should be larger than sixty percent and the eigenvalue exceeds one, two main factors could be extracted from the 17 items of this scale. The cumulative variance contribution rate of the two main factors is 67.329%, indicating that there is little information to be removed and the result of factor analysis is trusty.

alt1, alt3, alt4, alt5, alt6, alt8, alt9, alt10, alt11, alt12, and alt13 have a large load on factor 1, so they can be named alternatives factor; con1, con2, con3, con4, con6, and con7 have a large load on factor 2, which can be named control factor. Each factor load is greater than zero point five, and each item does not have serious cross load. Each measurement item is clustered under the corresponding factor, so it indicates that the scale tends to have ideal structural validity.

Table G KMO and Bartlett test of entrepreneurial self-efficacy scale

|                                   |                      |         |
|-----------------------------------|----------------------|---------|
| KMO sampling suitability quantity |                      | 0.890   |
| Bartlett's spherical test         | Last read chi square | 998.623 |
|                                   | Degree of freedom    | 15      |
|                                   | Significance         | 0.000   |

KMO value is 0.890, higher than zero point five; the statistical value of Bartlett's spherical test is 998.623, and the p value acquired by analysis is 0.000, which is lower than the significance level of five percent, suggesting that this scale tends to be appropriate for factor analysis.

Table H Factor analysis result of entrepreneurial self-efficacy scale

|                     | Factor<br>1 |
|---------------------|-------------|
| ents1               | 0.848       |
| ents2               | 0.900       |
| ents3               | 0.769       |
| ents4               | 0.816       |
| ents5               | 0.686       |
| ents6               | 0.749       |
| Eigenvalue          | 3.817       |
| Variance percentage | 63.620      |
| Cumulative %        | 63.620      |

One main factor could be extracted from the six items of this scale. The cumulative variance contribution rate of this main factor is 63.620%, which indicates that there is little information to be eliminated; meanwhile, the result of factor analysis is faithful. Each factor load is higher than zero point five, so it suggests that this scale tends to have good structural validity.

Table I KMO and Bartlett test of optimism scale

|                                   |                      |         |
|-----------------------------------|----------------------|---------|
| KMO sampling suitability quantity |                      | 0.894   |
| Bartlett's spherical test         | Last read chi square | 1104.28 |
|                                   | Degree of freedom    | 15      |
|                                   | Significance         | 0.000   |

KMO value is 0.894, higher than zero point five; the statistical value of Bartlett's spherical test reaches 1104.28, and the p value acquired by analysis is 0.000, which is lower than the significance level of five percent, which indicates that this scale tends to be appropriate for factor analysis.

Table J Factor analysis result of optimism scale

|                     | Factor<br>1 |
|---------------------|-------------|
| opt1                | 0.832       |
| opt2                | 0.868       |
| opt3                | 0.680       |
| opt4                | 0.909       |
| opt5                | 0.750       |
| opt6                | 0.797       |
| Eigenvalue          | 3.931       |
| Variance percentage | 65.513      |
| Cumulative %        | 65.513      |

One main factor can be refined from the six items of this scale. The cumulative variance contribution rate of this main factor is 65.513%, which indicates that there is little information to be eliminated, and the result of factor analysis is trusty. Each factor load is larger than zero point five, hence it suggests that this scale tends to have favorable structural validity.

Table K KMO and Bartlett test of entrepreneurship competence scale

|                                   |                      |          |
|-----------------------------------|----------------------|----------|
| KMO sampling suitability quantity |                      | 0.856    |
| Bartlett's spherical test         | Last read chi square | 2634.925 |
|                                   | Degree of freedom    | 105      |
|                                   | Significance         | 0.000    |

KMO value is 0.856, bigger than zero point five; the statistical value of Bartlett's spherical test is 2634.925, and the p value acquired by analysis is 0.000, which is lower than the significance level of five percent, showing that this scale tends to be ideal for factor analysis.

Table L Factor analysis result of entrepreneurship competence scale

|       | Factor |              |              |       |       |
|-------|--------|--------------|--------------|-------|-------|
|       | 1      | 2            | 3            | 4     | 5     |
| oppa1 | 0.117  | 0.211        | <b>0.828</b> | 0.188 | 0.115 |
| oppa2 | 0.073  | 0.160        | <b>0.816</b> | 0.083 | 0.241 |
| oppa3 | 0.151  | 0.292        | <b>0.801</b> | 0.167 | 0.141 |
| coma1 | 0.160  | <b>0.777</b> | 0.270        | 0.035 | 0.231 |
| coma2 | 0.021  | <b>0.790</b> | 0.219        | 0.152 | 0.200 |

|                     |              |              |        |              |              |
|---------------------|--------------|--------------|--------|--------------|--------------|
| coma3               | 0.199        | <b>0.838</b> | 0.175  | 0.018        | 0.172        |
| cona1               | 0.145        | 0.372        | 0.061  | 0.116        | <b>0.724</b> |
| cona2               | 0.111        | 0.228        | 0.218  | 0.024        | <b>0.795</b> |
| cona3               | 0.186        | 0.079        | 0.203  | 0.056        | <b>0.847</b> |
| fin1                | <b>0.840</b> | 0.108        | 0.161  | 0.050        | 0.249        |
| fin2                | <b>0.856</b> | 0.117        | 0.137  | 0.272        | 0.111        |
| fin3                | <b>0.824</b> | 0.165        | 0.039  | 0.329        | 0.101        |
| opea1               | 0.372        | 0.065        | 0.080  | <b>0.731</b> | 0.031        |
| opea2               | 0.157        | 0.020        | 0.160  | <b>0.869</b> | 0.028        |
| opea4               | 0.098        | 0.107        | 0.146  | <b>0.837</b> | 0.106        |
| Eigenvalue          | 2.465        | 2.351        | 2.338  | 2.286        | 2.185        |
| Variance percentage | 16.433       | 15.671       | 15.585 | 15.242       | 14.568       |
| Cumulative %        | 16.433       | 32.105       | 47.689 | 62.932       | 77.499       |

Five main factors could be refined from the 15 items of this scale. The cumulative variance contribution rate of the five main factors is 77.499%, which indicates that there is little information to be eliminated; the result of factor analysis is trusty.

oppa1-oppa3 has a large load on factor 3, which can be named opportunity ability factor; coma1-coma3 has a large load on factor 2, so it can be named commitment ability factor; cona1-cona3 has a large load on factor 5, so it can be named as conception ability factor; fina1-fina3 has a large load on factor 1, which can be named financing ability factor; opea1, opea2, and opea4 have a large load on factor 4, so they can be named opportunity ability factor. Each factor load is greater than zero point five, and each item does not have serious cross load. Each measurement item is clustered under the corresponding factor, so it shows that this scale has good structural validity.

Then we perform confirmatory factor analysis.

Figure A Confirmatory factor analysis

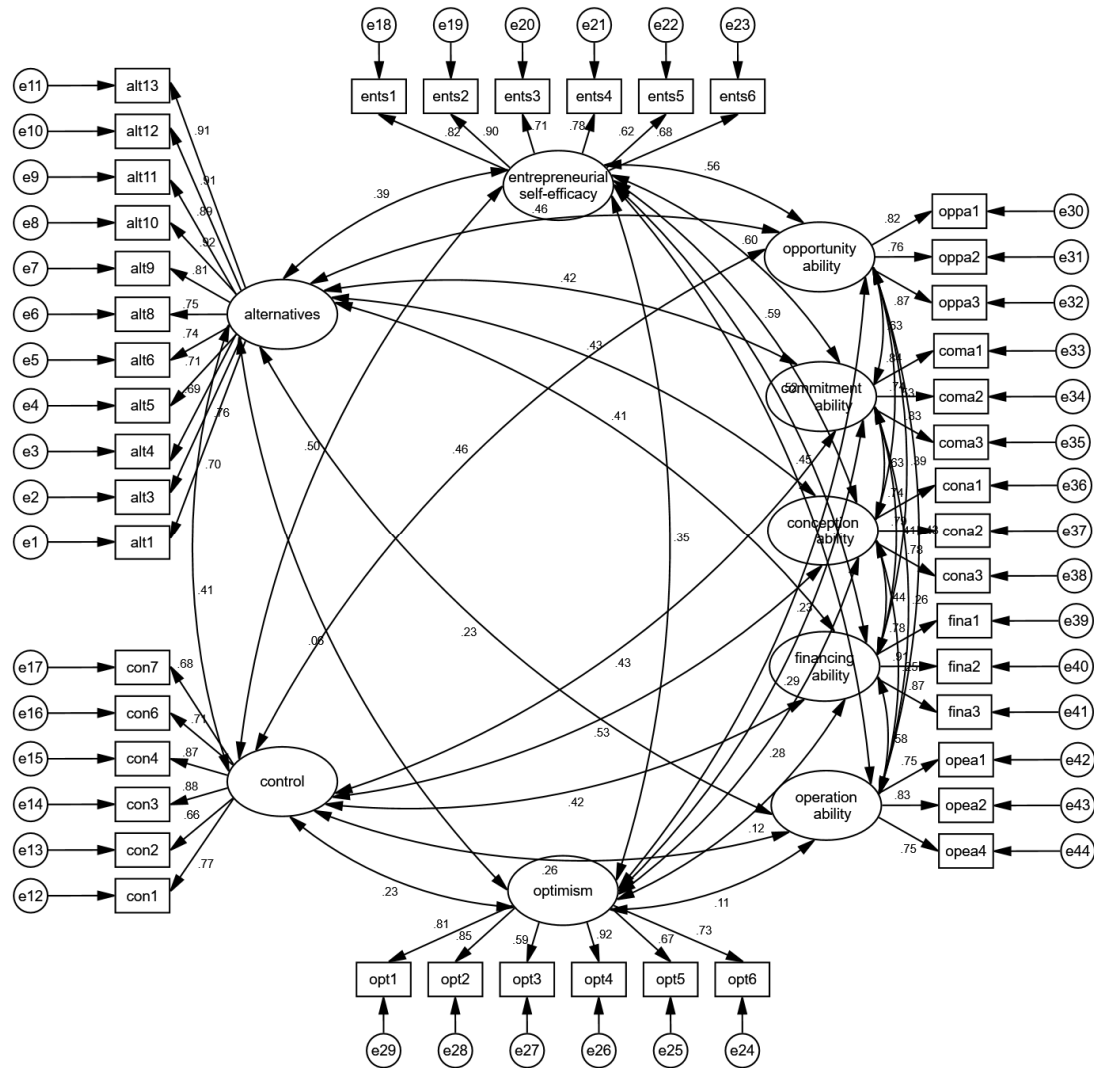

Table M Model fitting index of the scale

| Index                   | Absolute fit index |       | Incremental fit index |       |       | Parsimony fit index |       |
|-------------------------|--------------------|-------|-----------------------|-------|-------|---------------------|-------|
| Specific classification | X <sup>2</sup> /df | RMSEA | IFI                   | TLI   | CFI   | PGFI                | PNFI  |
| Judgment criteria       | <5                 | <0.08 | >0.9                  | >0.9  | >0.9  | >0.5                | >0.5  |
| Fitness effect          | 1.722              | 0.047 | 0.935                 | 0.929 | 0.935 | 0.722               | 0.786 |

From the absolute fitting index, X<sup>2</sup>/df value is 1.722, lower than five. RMSEA value is 0.047, lower than zero point zero eight. The absolute fitting index is ideal. In terms of incremental fit index, the value of IFI is 0.935, which is larger than zero point nine. The value of TLI is 0.929, bigger than zero point nine. The value of CFI is 0.935, greater than zero point nine. The fitting of incremental fit index is ideal. In terms of parsimony fitting index, the value of PGFI is 0.722, which is greater than zero point five. The value of PNFI is 0.786, greater than zero point five. The parsimony fitting index is ideal. Overall, the index

adaptation of the scale is ideal.

Table N Convergent validity of the scale

| Dimension                        | Item  | Standardized<br>factor load | CR    | AVE   |
|----------------------------------|-------|-----------------------------|-------|-------|
| alternatives                     | alt1  | 0.705                       | 0.953 | 0.650 |
|                                  | alt3  | 0.761                       |       |       |
|                                  | alt4  | 0.693                       |       |       |
|                                  | alt5  | 0.712                       |       |       |
|                                  | alt6  | 0.743                       |       |       |
|                                  | alt8  | 0.751                       |       |       |
|                                  | alt9  | 0.812                       |       |       |
|                                  | alt10 | 0.921                       |       |       |
|                                  | alt11 | 0.892                       |       |       |
|                                  | alt12 | 0.914                       |       |       |
|                                  | alt13 | 0.909                       |       |       |
|                                  | con1  | 0.768                       |       |       |
| control                          | con2  | 0.656                       | 0.893 | 0.584 |
|                                  | con3  | 0.877                       |       |       |
|                                  | con4  | 0.870                       |       |       |
|                                  | con6  | 0.705                       |       |       |
|                                  | con7  | 0.679                       |       |       |
|                                  | ents1 | 0.823                       |       |       |
| entrepreneurial<br>self-efficacy | ents2 | 0.897                       | 0.888 | 0.573 |
|                                  | ents3 | 0.707                       |       |       |
|                                  | ents4 | 0.777                       |       |       |
|                                  | ents5 | 0.623                       |       |       |
|                                  | ents6 | 0.683                       |       |       |
|                                  | opt1  | 0.811                       |       |       |
| optimism                         | opt2  | 0.848                       | 0.895 | 0.593 |
|                                  | opt3  | 0.595                       |       |       |
|                                  | opt4  | 0.921                       |       |       |
|                                  | opt5  | 0.667                       |       |       |
|                                  | opt6  | 0.730                       |       |       |
|                                  | oppa1 | 0.821                       |       |       |
| opportunity ability              | oppa2 | 0.765                       | 0.859 | 0.670 |
|                                  | oppa3 | 0.866                       |       |       |
|                                  | coma1 | 0.838                       |       |       |
| commitment<br>ability            | coma2 | 0.737                       | 0.843 | 0.643 |
|                                  | coma3 | 0.826                       |       |       |
|                                  | cona1 | 0.736                       |       |       |
| conception ability               | cona2 | 0.795                       | 0.643 | 0.596 |
|                                  | cona3 | 0.784                       |       |       |
| financing ability                | fina1 | 0.779                       | 0.888 | 0.725 |



|                   |       |       |       |       |
|-------------------|-------|-------|-------|-------|
|                   | fina2 | 0.905 |       |       |
|                   | fina3 | 0.866 |       |       |
|                   | opea1 | 0.748 |       |       |
| operation ability | opea2 | 0.833 | 0.822 | 0.607 |
|                   | opea4 | 0.753 |       |       |

The standardized load value of each item of the scale of alternatives, control, entrepreneurial self-efficacy, optimism, opportunity ability, commitment ability, conception ability, financing ability, and operation ability is larger than zero point five, meeting the standard. The CR values are 0.953, 0.893, 0.888, 0.895, 0.859, 0.843, 0.643, 0.888, and 0.822, all higher than 0.6; the values of AVE are 0.650, 0.584, 0.573, 0.593, 0.670, 0.643, 0.596, 0.725, and 0.607, which are bigger than zero point five, which indicates that the convergent validity of this scale tends to be up to standard.

### Common Method Variance Analysis

Common method variance is likely to refer to the artificial covariance between prediction variables and standard variables brought about by the same data sources or rater, the same measurement atmosphere, project contexts, and the nature of the projects themselves. Such an artificial covariance may seriously confuse the research result and potentially mislead the conclusion, which tends to be a kind of systematic error. Harman single factor test is adopted to check whether there is a common method variance. There are two judgment criteria for common method variance: only one factor could be extracted; multiple factors could be extracted, however, the variance interpretation rate of the first factor is higher than forty percent.

Table O Common method variance test

| Component | Total  | Initial eigenvalue  |              | Extraction sums of squared loadings |                     |              |
|-----------|--------|---------------------|--------------|-------------------------------------|---------------------|--------------|
|           |        | Variance percentage | Cumulative % | Total                               | Variance percentage | Cumulative % |
| 1         | 13.793 | 31.347              | 31.347       | 13.793                              | 31.347              | 31.347       |
| 2         | 5.011  | 11.388              | 42.735       | 5.011                               | 11.388              | 42.735       |
| 3         | 3.109  | 7.066               | 49.802       | 3.109                               | 7.066               | 49.802       |
| 4         | 2.401  | 5.458               | 55.259       | 2.401                               | 5.458               | 55.259       |
| 5         | 1.996  | 4.537               | 59.797       | 1.996                               | 4.537               | 59.797       |
| 6         | 1.579  | 3.590               | 63.386       | 1.579                               | 3.590               | 63.386       |
| 7         | 1.364  | 3.100               | 66.487       | 1.364                               | 3.100               | 66.487       |
| 8         | 1.073  | 2.439               | 68.926       | 1.073                               | 2.439               | 68.926       |
| 9         | 1.020  | 2.318               | 71.244       | 1.020                               | 2.318               | 71.244       |

Factor analysis is carried out on all items requiring subjects to answer. The results show that the eigenvalues of nine factors are higher than one, and the cumulative total contribution rate reaches 71.244%. The variance interpretation rate of the first factor is 31.347, smaller than forty percent, indicating that common method variance does not exist within our research.

### Descriptive Analysis

Skewness is regarded as a measurement of the skew direction and degree of statistical

data distribution, and a digital feature of the degrees of asymmetry of statistical data distribution. Kurtosis is viewed as a statistic that can describe the steepness and slowness of all value distribution patterns in the population.

Table P Descriptive analysis

|                               | Number | Minimum | Maximum | Average | Standard deviation | Skewness | Kurtosis |
|-------------------------------|--------|---------|---------|---------|--------------------|----------|----------|
| cognitive flexibility         | 323    | 1       | 5       | 3.630   | 0.754              | -1.280   | 2.362    |
| alternatives control          | 323    | 1       | 5       | 3.705   | 0.925              | -1.033   | 1.309    |
| entrepreneurial self-efficacy | 323    | 1       | 5       | 3.491   | 0.785              | -0.533   | 0.441    |
| optimism                      | 323    | 2       | 5       | 3.711   | 0.693              | -0.417   | 0.139    |
| entrepreneurship competence   | 323    | 1       | 5       | 3.790   | 0.725              | -1.451   | 3.521    |
| opportunity ability           | 323    | 1.8     | 5       | 3.694   | 0.573              | -1.201   | 2.212    |
| commitment ability            | 323    | 1       | 5       | 3.905   | 0.819              | -0.979   | 1.360    |
| conception ability            | 323    | 2       | 5       | 3.683   | 0.781              | -0.442   | -0.311   |
| financing ability             | 323    | 1       | 5       | 3.620   | 0.819              | -0.753   | 0.658    |
| operation ability             | 323    | 1       | 5       | 3.723   | 0.812              | -1.067   | 1.407    |
|                               | 323    | 2       | 5       | 3.540   | 0.765              | -0.367   | -0.582   |

The mean value of every variable is larger than three, showing that the scores of these variables are high. The absolute value of skewness of every variable is lower than three and the absolute value of kurtosis is lower than ten, suggesting that these variables roughly conform to the normal distribution.

### Correlation Analysis

The degree of correlation between the two variables tends to be described by the correlation coefficient  $r$ . The value of the correlation coefficient  $r$  is between minus one and one, but it can be any value in this range.

Table Q Correlation analysis

|                                  | 1       | 2       | 3       | 4       | 5       | 6       | 7       | 8       | 9 |
|----------------------------------|---------|---------|---------|---------|---------|---------|---------|---------|---|
| 1. alternatives                  | 1       |         |         |         |         |         |         |         |   |
| 2. control                       | 0.404** | 1       |         |         |         |         |         |         |   |
| 3. entrepreneurial self-efficacy | 0.365** | 0.494** | 1       |         |         |         |         |         |   |
| 4. optimism                      | 0.050   | 0.226** | 0.335** | 1       |         |         |         |         |   |
| 5. opportunity ability           | 0.423** | 0.438** | 0.512** | 0.225** | 1       |         |         |         |   |
| 6. commitment ability            | 0.386** | 0.386** | 0.533** | 0.259** | 0.533** | 1       |         |         |   |
| 7. conception ability            | 0.382** | 0.482** | 0.527** | 0.232** | 0.453** | 0.530** | 1       |         |   |
| 8. financing ability             | 0.403** | 0.409** | 0.505** | 0.075   | 0.341** | 0.354** | 0.398** | 1       |   |
| 9. operation ability             | 0.224** | 0.247** | 0.403** | 0.102   | 0.352** | 0.234** | 0.219** | 0.494** | 1 |

\*\*\*, \*\*, \* represent  $P < 0.001$ ,  $P < 0.01$ ,  $P < 0.05$ , respectively

All variables are positively correlated; meanwhile, the correlation coefficients are less than zero point eight, which indicates that multicollinearity problem does not exist between variables.
